# Supplementary material
Source: MDPI journal article supplement (https://www.mdpi.com/1424-2818/14/6/465)
Supplement: s1 [file s1]

## Supplementary material

Table S1. Methods used to assess density of brown hare in the two study areas (R – Rogów, D – Dobieszyn)

\* data from the Department of Wildlife Management, WULS

| Mode of estimation  | Parameter            | Years                                                | Habitat        | Season                                      | Study area       | Sample size                                                                         |
|---------------------|----------------------|------------------------------------------------------|----------------|---------------------------------------------|------------------|-------------------------------------------------------------------------------------|
| Belt assessment*    | n ind./100 ha        | 1965 - 2003                                          | fields         | autumn and (in most years) preceding spring | Rogów            | one census per season/per year; 19 in autumn, 14 in spring                          |
| Spot-light counts   | n ind./100 ha        | 2004 – 2015 in both areas; 2016 – 2018 only in Rogów | fields         | spring and/or autumn                        | Rogów, Dobieszyn | n of counts: R – 36 (28 in autumn, 8 in spring), D – 25 (20 in autumn, 5 in spring) |
| Driving census*     | n ind./100 ha        | 1983 - 2018                                          | forest         | spring                                      | Rogów            | one census per year, 27 in total                                                    |
| Snow tracking       | n tracks/1 km/24 h   | 2011                                                 | fields, forest | winter                                      | Rogów, Dobieszyn | total transect length: R - 71.1; D - 45.4<br>n of transects: R – 66; D - 43         |
| Pellet group counts | n pellet groups/1 km | 2011                                                 | fields         | spring                                      | Rogów, Dobieszyn | total transect length: R - 52.61; D - 37.76<br>n of stretches: R – 575; D - 428     |

Table S2. Changes in food composition (% share of food items) of red fox in Rogów (central Poland) in three periods as based on food remains collected at natal dens. Source of data: 1978 – 1991 (Goszczyński 1995), 1999 – 2002 (Juszko 2006), 2011 – 2021 (this study).

| Food type                                                   | Period      |             |             |
|-------------------------------------------------------------|-------------|-------------|-------------|
|                                                             | 1978 – 1991 | 1999 – 2002 | 2011 – 2021 |
| Hen <i>Gallus gallus domesticus</i>                         | 54.1        | 32.1        | 36.4        |
| Domestic pigeon <i>Columba livia domestica</i>              | 4.1         | 3.1         | 1.2         |
| Domestic duck <i>Anas platyrhynchos</i> f. <i>domestica</i> |             | 3.1         |             |
| Domestic birds total                                        | 58.2        | 38.3        | 37.6        |

|                                                                                       |      |      |      |
|---------------------------------------------------------------------------------------|------|------|------|
| Wood pigeon <i>Columba palumbus</i>                                                   | 0.3  | 0.0  | 0.3  |
| Common pheasant <i>Phasianus colchicus</i>                                            | 4.1  | 4.1  | 0.3  |
| Grey partridge <i>Perdix perdix</i>                                                   | 1.8  | 1.0  |      |
| Other species and indefinite                                                          | 12.4 | 20.4 | 15.4 |
| Birds total                                                                           | 76.8 | 63.8 | 53.6 |
| Cattle                                                                                | 0.6  |      | 0.5  |
| Domestic dog <i>Canis familiaris</i>                                                  | 1.0  |      | 0.4  |
| Domestic cat <i>Felis catus</i>                                                       | 0.6  | 1.5  | 3.5  |
| Red fox <i>Vulpes vulpes</i>                                                          |      | 1.0  |      |
| Moose <i>Alces alces</i>                                                              |      |      | 0.1  |
| Red deer <i>Cervus elaphus</i>                                                        |      |      | 0.1  |
| Fallow deer <i>Dama dama</i>                                                          |      |      | 0.1  |
| Roe deer <i>Capreolus capreolus</i>                                                   | 1.3  | 6.1  | 4.3  |
| Wild boar <i>Sus scrofa</i>                                                           | 0.6  | 3.6  | 2    |
| Domestic pig <i>Sus domestica</i>                                                     |      |      | 6.8  |
| Coypu <i>Myocastor coypus</i>                                                         | 0.6  |      |      |
| Marten <i>Martes spp.</i>                                                             | 0.2  |      | 0.1  |
| European beaver <i>Castor fiber</i>                                                   |      |      | 0.1  |
| Indefinite                                                                            |      | 2.6  | 2.1  |
| Carrion total                                                                         | 4.9  | 14.8 | 20.1 |
| European hare <i>Lepus europaeus</i>                                                  | 12.7 | 4.1  | 0.1  |
| Wild rabbit <i>Oryctolagus cuniculus</i>                                              | 0.6  |      |      |
| Domestic rabbit <i>Oryctolagus cuniculus</i> f. <i>domesticus</i>                     |      |      | 0.4  |
| Least weasel <i>Mustela nivalis</i>                                                   | 0.2  |      | 0.3  |
| Hedgehog <i>Erinaceus spp.</i> , mole <i>Talpa europaea</i> , shrew <i>Sorex spp.</i> | 3.6  | 7.1  | 3.8  |
| Red squirrel <i>Sciurus vulgaris</i>                                                  |      |      | 0.2  |
| Norway rat <i>Rattus norvegicus</i>                                                   |      |      | 0.6  |
| Small rodents                                                                         | 1.2  | 2.6  | 6.9  |
| Reptile                                                                               |      |      | 0.9  |
| Amphibian                                                                             |      |      | 0.4  |
| Fishes                                                                                |      |      | 3.4  |
| Indefinite                                                                            |      | 5.1  |      |
| Human refuse                                                                          |      | 2.6  | 9.2  |
| Total number of items                                                                 | 606  | 196  | 960  |
